# Supplementary material
Source: HighWire-hosted journal article supplement (https://cmaj.ca/content/suppl/2017/11/21/189.47.E1448)

## APPENDIX 3 (AS SUPPLIED BY THE AUTHORS): STUDY SELECTION DIAGRAMS

### For recommendations on PrEP Regimens

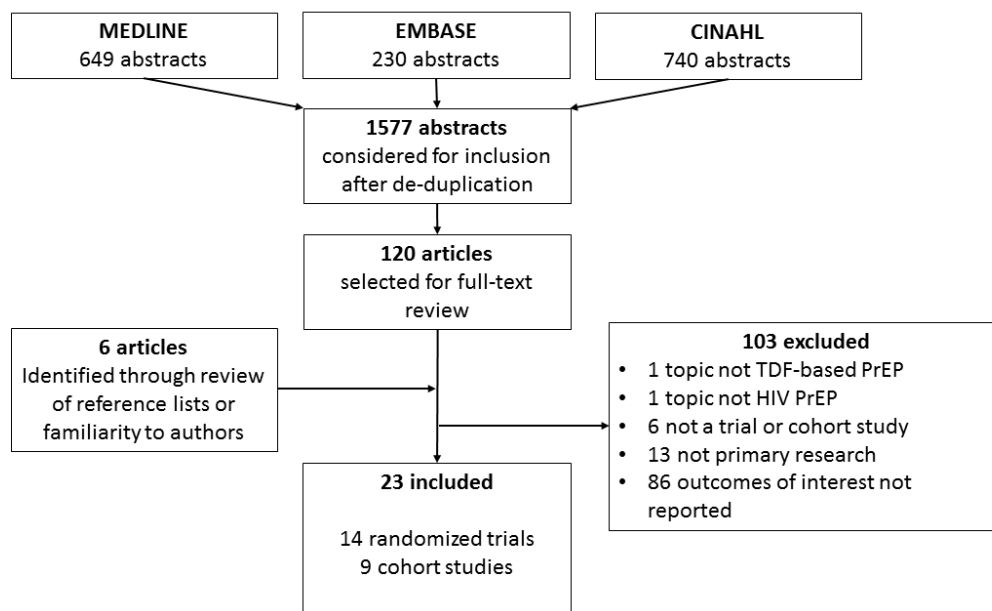

### For recommendations on nPEP Regimens

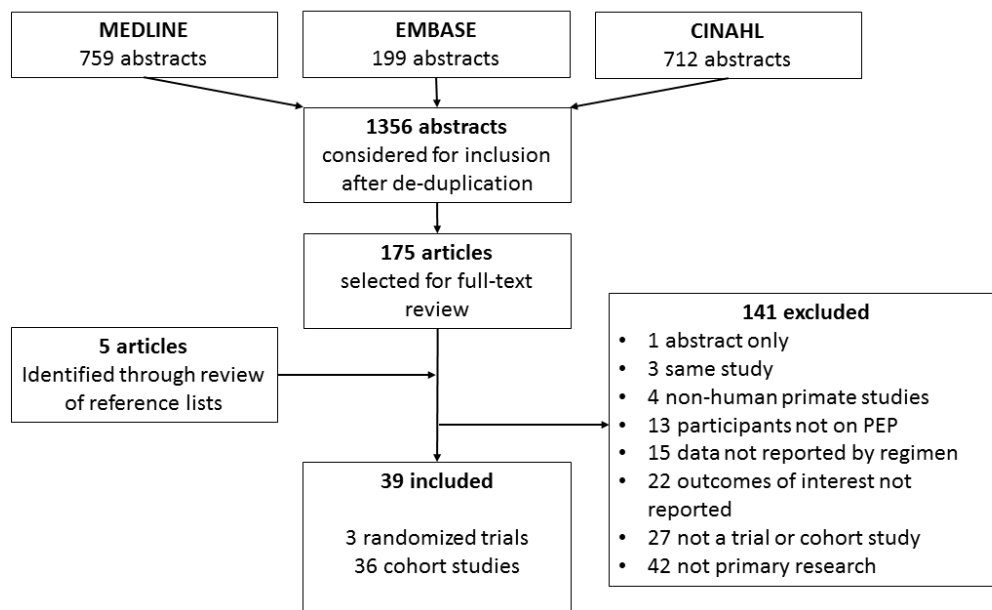

Supplement: 170494-guide-3-at.pdf [file 170494-guide-3-at.pdf]
